# Supplementary material
Source: ML conference proceedings conference paper supplement (https://www.ecva.net/papers/eccv_2020/papers_ECCV/html/123570681_ECCV_2020_paper.php)
Supplement: Supplementary file 3 [file 123570681-supp.zip]

Archive with 9 entries (6 files):
- supp_1714/
- supp_1714/supp_1714.pdf
- __MACOSX/
- __MACOSX/supp_1714/
- __MACOSX/supp_1714/._supp_1714.pdf
- supp_1714/.DS_Store
- __MACOSX/supp_1714/._.DS_Store
- supp_1714/DRG.py
- __MACOSX/supp_1714/._DRG.py
